# Supplementary material
Source: publisher figshare collection journal article supplement (https://diabetesjournals.figshare.com/articles/dataset/_/14838837)
Supplement: Supplementary file 1 [file 1]

*Supplementary Table 1—Association between the time in range parameters (TIR, TBR and TAR) and clinical characteristics of the patients.*

| Variables               | TIR        |             |              |          | TBR        |             |              |          | TAR        |             |              |          |
|-------------------------|------------|-------------|--------------|----------|------------|-------------|--------------|----------|------------|-------------|--------------|----------|
|                         | Univariate |             | Multivariate |          | Univariate |             | Multivariate |          | Univariate |             | Multivariate |          |
|                         | CC         | <i>p</i>    | $\beta$      | <i>p</i> | CC         | <i>p</i>    | $\beta$      | <i>p</i> | CC         | <i>p</i>    | $\beta$      | <i>p</i> |
| Age                     | -0.092     | 0.42        |              |          | -0.071     | 0.53        |              |          | 0.125      | 0.27        |              |          |
| Gender                  | 0.013      | 0.91        |              |          | -0.196     | <b>0.08</b> | –            |          | 0.127      | 0.26        |              |          |
| Diabetes duration       | -0.085     | 0.46        |              |          | 0.075      | 0.51        |              |          | 0.083      | 0.47        |              |          |
| Body Mass Index         | -0.183     | <b>0.11</b> | –            |          | -0.043     | 0.71        |              |          | 0.154      | 0.18        |              |          |
| Fat percentage          | -0.096     | 0.42        |              |          | -0.195     | <b>0.10</b> | –            |          | 0.163      | 0.17        |              |          |
| Predicted muscle mass   | 0.018      | 0.88        |              |          | 0.194      | <b>0.10</b> | –            |          | -0.126     | 0.28        |              |          |
| Waist-hip ratio         | -0.072     | 0.53        |              |          | 0.017      | 0.88        |              |          | -0.016     | 0.89        |              |          |
| SBP                     | -0.127     | 0.27        |              |          | -0.107     | 0.35        |              |          | 0.094      | 0.41        |              |          |
| DBP                     | 0.070      | 0.54        |              |          | -0.148     | 0.20        |              |          | -0.036     | 0.76        |              |          |
| Heart rate              | 0.085      | 0.46        |              |          | -0.047     | 0.69        |              |          | -0.064     | 0.58        |              |          |
| Alcohol intake          | 0.035      | 0.76        |              |          | 0.038      | 0.74        |              |          | 0.04       | 0.73        |              |          |
| Pack years              | 0.070      | 0.56        |              |          | 0.267      | <b>0.02</b> | 0.258        | 0.04     | -0.187     | <b>0.12</b> | -0.242       | 0.04     |
| Microvascular disease   | -0.111     | 0.33        |              |          | -0.015     | 0.2         |              |          | 0.792      | <b>0.09</b> | –            |          |
| Macrovascular disease   | 0.018      | 0.87        |              |          | 0.097      | 0.4         |              |          | -0.005     | 0.97        |              |          |
| Adjusted R <sup>2</sup> |            |             |              |          |            |             | 0.052        |          |            |             | 0.045        |          |

The univariate analysis represent Spearman's correlation coefficients. For the multivariate analysis

logarithmic transformation was performed for the TIR and TBR and square root transformation for the

TAR before each analysis to secure the normality of the residuals. Variables were selected by

backward selection method. Abbreviations: SBP, systolic blood pressure; DBP, diastolic blood

pressure; CC, correlation coefficients;  $\beta$ , standardized coefficients Beta.
