# Supplementary material
Source: publisher figshare collection journal article supplement (https://diabetesjournals.figshare.com/articles/dataset/_/14838837)
Supplement: Supplementary file 2 [file 1]

*Supplemental figure 1—Relationship between HbA<sub>1c</sub> and (A) time in range (TIR), (B) time above range (TAR) and (C) time below range (TBR). The solid lines represent the best fit. The best fit in (A) is an exponential regression of 2<sup>nd</sup> order, in (B) linear regression and in (C) an exponential regression of 2<sup>nd</sup> order. The dotted lines represent the 95% prediction bounds.*
